# Supplementary material for: Changes in the Elemental and Metabolite Profile of Wheat Phloem Sap during Grain Filling Indicate a Dynamic between Plant Maturity and Time of Day
Source: MDPI journal article supplement (doi:10.3390/metabo8030053), 2018-09-19
Supplement: s1 [file s1]

## *Supplementary Material 1*

# Changes in the elemental and metabolite profile of wheat phloem sap during grain filling indicate a dynamic between plant maturity and time of day

Lachlan J. Palmer<sup>1\*</sup> and James C. R. Stangoulis<sup>1</sup>

<sup>1</sup> School of Biological Sciences, Flinders University, Bedford Park, South Australia 5042, Australia

\* **Correspondence:** Lachlan Palmer: [Lachlan.palmer@flinders.edu.au](mailto:Lachlan.palmer@flinders.edu.au)

**Table S1:** Sample numbers, mean and standard error of sample maturities (DAA) and sampling start times (hours:minutes:seconds) for sample groupings used for within-day variability elemental comparisons.

| Factor     | Grouping   | n   | Mean     | Std. Error |
|------------|------------|-----|----------|------------|
| DAA        | 1-2 DAA    | 32  | 1.2      | 0.07       |
|            | 8-12 DAA   | 61  | 9.9      | 0.11       |
|            | 17-21 DAA  | 77  | 18.9     | 0.11       |
| start time | before 2pm | 50  | 11:35:32 | 0:07:57    |
|            | after 2pm  | 120 | 15:33:02 | 0:03:13    |

**Table S2:** Sample numbers, average  $\pm$  standard errors of sample maturities (DAA) and sampling start times (hours:minutes:seconds) for sample groupings used for within-day variability metabolite profile comparisons.

| Measurement      | Grouping   | n  | Mean     | Std. Error |
|------------------|------------|----|----------|------------|
| DAA              | 8-12 DAA   | 28 | 9.7      | 0.18       |
|                  | 17-21 DAA  | 26 | 18.7     | 0.16       |
| collection start | Before 2pm | 18 | 12:26:23 | 0:10:22    |
|                  | After 2pm  | 36 | 15:47:40 | 0:7:18     |

**Table S3:** Average elemental concentrations found in phloem exudate samples for each maturity and time sampling combination. Also included are standard deviation and sample sizes for each grouping.

| Element<br>(transformation)                | Maturity<br>Grouping | within-day<br>Grouping | N  | Mean  | Standard<br>Error of<br>Mean | 95.0%<br>Lower<br>CL for<br>Mean | 95.0%<br>Upper<br>CL for<br>Mean |
|--------------------------------------------|----------------------|------------------------|----|-------|------------------------------|----------------------------------|----------------------------------|
| $\text{Mg}$<br>( $\sqrt{\text{mM}}$ )      | 1-2 DAA              | before 2pm             | 11 | 2.23  | 0.06                         | 2.10                             | 2.36                             |
|                                            |                      | after 2pm              | 19 | 2.12  | 0.09                         | 1.93                             | 2.30                             |
|                                            | 8-12 DAA             | before 2pm             | 10 | 2.90  | 0.15                         | 2.56                             | 3.23                             |
|                                            |                      | after 2pm              | 48 | 3.02  | 0.11                         | 2.79                             | 3.25                             |
|                                            | 17-21 DAA            | before 2pm             | 25 | 2.86  | 0.11                         | 2.64                             | 3.08                             |
|                                            |                      | after 2pm              | 48 | 2.75  | 0.09                         | 2.57                             | 2.94                             |
| K (mM)                                     | 1-2 DAA              | before 2pm             | 12 | 80.69 | 5.03                         | 69.62                            | 91.75                            |
|                                            |                      | after 2pm              | 19 | 94.09 | 5.50                         | 82.54                            | 105.65                           |
|                                            | 8-12 DAA             | before 2pm             | 10 | 72.34 | 5.28                         | 60.40                            | 84.28                            |
|                                            |                      | after 2pm              | 46 | 86.45 | 4.13                         | 78.14                            | 94.76                            |
|                                            | 17-21 DAA            | before 2pm             | 26 | 58.24 | 3.53                         | 50.97                            | 65.51                            |
|                                            |                      | after 2pm              | 49 | 56.28 | 2.77                         | 50.71                            | 61.86                            |
| $\text{Fe}$<br>( $\sqrt[3]{\mu\text{M}}$ ) | 1-2 DAA              | before 2pm             | 11 | 4.21  | 0.24                         | 3.67                             | 4.75                             |
|                                            |                      | after 2pm              | 17 | 5.85  | 0.38                         | 5.05                             | 6.65                             |
|                                            | 8-12 DAA             | before 2pm             | 9  | 5.84  | 0.21                         | 5.36                             | 6.32                             |
|                                            |                      | after 2pm              | 44 | 6.75  | 0.17                         | 6.41                             | 7.08                             |
|                                            | 17-21 DAA            | before 2pm             | 16 | 4.85  | 0.39                         | 4.03                             | 5.67                             |
|                                            |                      | after 2pm              | 31 | 5.61  | 0.23                         | 5.15                             | 6.08                             |
| $\text{Zn}$<br>( $\sqrt[3]{\mu\text{M}}$ ) | 1-2 DAA              | before 2pm             | 11 | 5.27  | 0.19                         | 4.85                             | 5.69                             |
|                                            |                      | after 2pm              | 19 | 5.15  | 0.19                         | 4.76                             | 5.54                             |
|                                            | 8-12 DAA             | before 2pm             | 10 | 6.98  | 0.25                         | 6.40                             | 7.55                             |
|                                            |                      | after 2pm              | 42 | 6.71  | 0.17                         | 6.37                             | 7.05                             |
|                                            | 17-21 DAA            | before 2pm             | 24 | 6.13  | 0.22                         | 5.68                             | 6.57                             |
|                                            |                      | after 2pm              | 37 | 6.16  | 0.18                         | 5.80                             | 6.52                             |

\*note that mean and 95% confidence limits (CL) can be un-transformed by squaring or cubing where appropriate to get units without transformation.
