# Supplementary material for: Changes in the Elemental and Metabolite Profile of Wheat Phloem Sap during Grain Filling Indicate a Dynamic between Plant Maturity and Time of Day
Source: MDPI journal article supplement (doi:10.3390/metabo8030053), 2018-09-19
Supplement: s1 [file s1]

## *Supplementary Material 2*

# **Changes in the elemental and metabolite profile of wheat phloem sap during grain filling indicate a dynamic between plant maturity and time of day**

Lachlan J. Palmer<sup>1\*</sup> and James C. R. Stangoulis<sup>1</sup>

<sup>1</sup> School of Biological Sciences, Flinders University, Bedford Park, South Australia 5042, Australia

\* **Correspondence:** Lachlan Palmer: [Lachlan.palmer@flinders.edu.au](mailto:Lachlan.palmer@flinders.edu.au)

**Table S4: Metabolites in the phloem exudate metabolite profile with significant time of day variability ('after 2pm' minus 'before 2pm') when collected at 8-12 DAA and 17-21 DAA.**

| Metabolite                   | transformation | DAA group | Sig.                | Mean Difference | Std. Error Difference | Fold change |
|------------------------------|----------------|-----------|---------------------|-----------------|-----------------------|-------------|
|                              |                |           | (2-tailed)          |                 |                       |             |
| 3-hydroxybenzoic acid 2TMS   | CBRT           | 8-12 DAA  | 0.000 <sup>un</sup> | -0.3            | 0.044                 | -15.7       |
|                              |                | 17-21 DAA | 0.000               | -0.2            | 0.03                  | -4.4        |
| Glutamine 3TMS               | CBRT           | 8-12 DAA  | 0.007               | 0.4             | 0.13                  | 3.3         |
|                              |                | 17-21 DAA | 0.034               | 0.4             | 0.16                  | 5.9         |
| Histidine 3TMS               | Ln             | 8-12 DAA  | 0.009               | 1               | 0.34                  | 2.6         |
|                              |                | 17-21 DAA | 0.019               | 1.6             | 0.64                  | 5           |
| UN16_25.71_339               | None           | 8-12 DAA  | 0.035               | -0.006          | 0.0029                | -1.6        |
|                              |                | 17-21 DAA | 0.037               | 0.01            | 0.0051                | 2.2         |
| Asparagine 3TMS              | Ln             | 8-12 DAA  | 0.022               | 1.3             | 0.53                  | 3.7         |
| Ornithine 3TMS               | None           | 8-12 DAA  | 0.012 <sup>un</sup> | 0.2             | 0.059                 | 3.6         |
| 3-amino-piperidin-2-one 2TMS | SQRT           | 8-12 DAA  | 0.015               | 0.3             | 0.099                 | 2.4         |
| UN08_17.96_360               | CBRT           | 8-12 DAA  | 0.036               | 0.1             | 0.065                 | 2.4         |
| Glyceric-3-phosphate 4TMS    | SQRT           | 8-12 DAA  | 0.049               | 0.1             | 0.054                 | 1.9         |
| Glycine 2TMS                 | None           | 8-12 DAA  | 0.040               | 0.01            | 0.005                 | 1.8         |
| Homoserine 3TMS              | None           | 8-12 DAA  | 0.025               | 0.05            | 0.023                 | 1.5         |
| Fructose MX1                 | None           | 8-12 DAA  | 0.045               | -0.1            | 0.05                  | -1.3        |
| UN10_19.08_217               | None           | 8-12 DAA  | 0.027               | -0.4            | 0.15                  | -1.3        |
| Glucose MX1                  | None           | 8-12 DAA  | 0.027               | -0.4            | 0.16                  | -1.4        |
| Octadecanoate 1TMS           | SQRT           | 8-12 DAA  | 0.025               | -0.2            | 0.068                 | -1.6        |
| Fumarate 2TMS                | None           | 8-12 DAA  | 0.040 <sup>un</sup> | -0.009          | 0.004                 | -1.6        |
| Quinic acid 5TMS             | SQRT           | 8-12 DAA  | 0.042               | -0.2            | 0.072                 | -1.7        |
| Shikimic acid 4TMS           | SQRT           | 8-12 DAA  | 0.036               | -0.1            | 0.044                 | -1.7        |
| Succinate 2TMS               | None           | 8-12 DAA  | 0.025 <sup>un</sup> | -0.03           | 0.012                 | -1.8        |
| UN04_15.56_185               | None           | 8-12 DAA  | 0.005               | -0.1            | 0.041                 | -1.9        |
| Hexadecanoate 1TMS           | SQRT           | 8-12 DAA  | 0.001               | -0.3            | 0.08                  | -1.9        |
| UN26_14.48_229               | Ln             | 8-12 DAA  | 0.006               | -0.8            | 0.27                  | -2.3        |
| UN03_14.36_320               | Ln             | 8-12 DAA  | 0.000               | -1.1            | 0.24                  | -3          |
| UN02_14.04_350               | SQRT           | 8-12 DAA  | 0.003 <sup>un</sup> | -0.1            | 0.039                 | -3.1        |
| UN06_17.16_259               | None           | 8-12 DAA  | 0.000 <sup>un</sup> | -0.008          | 0.0014                | -5.1        |
| Itaconic acid 2TMS           | None           | 8-12 DAA  | 0.001 <sup>un</sup> | -0.01           | 0.0027                | -10.1       |
| 4-hydroxybenzoic acid 2TMS   | None           | 17-21 DAA | 0.000 <sup>un</sup> | 0.2             | 0.035                 | 3.9         |
| Tyrosine 3TMS                | None           | 17-21 DAA | 0.018               | 1.3             | 0.49                  | 2.6         |
| UN14_25.08_503               | None           | 17-21 DAA | 0.041               | 0.1             | 0.044                 | 2.5         |
| UN20_32.34_503               | InvCBRT        | 17-21 DAA | 0.004               | -1.1            | 0.32                  | 2.4         |
| UN22_33.13_513               | SQRT           | 17-21 DAA | 0.038               | 0.03            | 0.015                 | 2.3         |
| UN24_33.79_423               | None           | 17-21 DAA | 0.003               | 0.04            | 0.012                 | 2.2         |
| Lysine 4TMS                  | None           | 17-21 DAA | 0.032               | 0.7             | 0.29                  | 2.2         |
| Phenylalanine 2TMS           | None           | 17-21 DAA | 0.030               | 1.6             | 0.68                  | 2.2         |
| Isoleucine 2TMS              | None           | 17-21 DAA | 0.044               | 2.1             | 1                     | 2.1         |
| UN21_32.89_387               | None           | 17-21 DAA | 0.001               | 0.007           | 0.0017                | 2           |
| Valine 2TMS                  | None           | 17-21 DAA | 0.044               | 3               | 1.38                  | 1.9         |
| UN23_33.43_517               | None           | 17-21 DAA | 0.005               | 0.007           | 0.0023                | 1.7         |
| Putrescine 4TMS              | None           | 17-21 DAA | 0.044               | 0.6             | 0.28                  | 1.7         |

un = inhomogeneous sample variances as determined from Levene's test of equal variances,  
Ln = natural logarithm, InvCBRT = inverse cube root, SQRT = square root, CBRT = cube root. xTMS = Trimethylsilyl derivative where x = the number of TMS groups; yMX = methoxyamine derivatised product where y = 1 or 2

**Table S5: Metabolites in the phloem exudate metabolite profile with significant maturity variability (17-21DAA minus 8-12 DAA) when collected before and after 2pm.**

| Metabolite                     | transformation | Collection time | Sig. (2-tailed)    | Mean Difference | Std. Error Difference | fold change |
|--------------------------------|----------------|-----------------|--------------------|-----------------|-----------------------|-------------|
| 3-amino-piperidin-2-one 2TMS   | SQRT           | Before 2pm      | .027               | -0.3            | 0.10                  | -5.1        |
|                                |                | After 2pm       | .001               | -0.3            | 0.084                 | -3.3        |
| Alanine 2TMS                   | SQRT           | Before 2pm      | .042               | -0.4            | 0.16                  | -4.0        |
|                                |                | After 2pm       | .011 <sup>un</sup> | -0.2            | 0.088                 | -2.0        |
| Arginine 3TMS                  | Ln             | Before 2pm      | .006               | -1.7            | 0.55                  | -5.7        |
|                                |                | After 2pm       | .000               | -1.2            | 0.30                  | -3.4        |
| Histidine 3TMS                 | Ln             | Before 2pm      | .011               | -1.7            | 0.59                  | -5.6        |
|                                |                | After 2pm       | .009               | -1.1            | 0.38                  | -2.9        |
| Homoserine 3TMS                | None           | Before 2pm      | .026               | -0.07           | 0.029                 | -2.7        |
|                                |                | After 2pm       | .000               | -0.09           | 0.019                 | -2.2        |
| Lysine 4TMS                    | None           | Before 2pm      | .001               | -1.3            | 0.31                  | -3.4        |
|                                |                | After 2pm       | .010               | -0.7            | 0.24                  | -1.5        |
| Pyroglutamate 2TMS             | None           | Before 2pm      | .006               | -8.2            | 2.55                  | -2.0        |
|                                |                | After 2pm       | .024               | -3.7            | 1.58                  | -1.4        |
| Serine 3TMS                    | None           | Before 2pm      | .012               | -8.1            | 2.86                  | -2.8        |
|                                |                | After 2pm       | .001               | -5.1            | 1.40                  | -1.7        |
| Trehalose 8TMS                 | Ln             | Before 2pm      | .008 <sup>un</sup> | -2.1            | 0.53                  | -8.3        |
|                                |                | After 2pm       | .001               | -1.3            | 0.36                  | -3.7        |
| UN26_14.48_229                 | Ln             | Before 2pm      | .035 <sup>un</sup> | -1.5            | 0.54                  | -4.5        |
|                                |                | After 2pm       | .024               | -0.6            | 0.27                  | -1.9        |
| Isoleucine 2TMS                | None           | Before 2pm      | .037               | -2.0            | 0.89                  | -2.1        |
| Threonine 3TMS                 | None           | Before 2pm      | .034               | -1.0            | 0.44                  | -2.1        |
| Valine 2TMS                    | None           | Before 2pm      | .031               | -3.5            | 1.46                  | -2.1        |
| 4-hydroxybenzoic acid 2TMS     | None           | Before 2pm      | .022 <sup>un</sup> | -0.08           | 0.030                 | -2.2        |
| Shikimic acid 4TMS             | SQRT           | After 2pm       | .009 <sup>un</sup> | 0.2             | 0.064                 | 2.4         |
| Quinic acid 5TMS               | SQRT           | After 2pm       | .037 <sup>un</sup> | 0.2             | 0.11                  | 2.2         |
| Succinate 2TMS                 | None           | After 2pm       | .024 <sup>un</sup> | 0.04            | 0.017                 | 2.1         |
| Hexadecanoate 1TMS             | SQRT           | After 2pm       | .005 <sup>un</sup> | 0.3             | 0.097                 | 2.0         |
| Glycine 3TMS                   | None           | After 2pm       | .002 <sup>un</sup> | 0.1             | 0.037                 | 1.9         |
| Octadecanoate 1TMS             | SQRT           | After 2pm       | .007 <sup>un</sup> | 0.2             | 0.084                 | 1.9         |
| 3-hydroxybenzoic acid 2TMS     | CBRT           | After 2pm       | .023               | 0.05            | 0.020                 | 1.9         |
| UN16_25.71_339                 | None           | After 2pm       | .004 <sup>un</sup> | 0.01            | 0.0030                | 1.9         |
| Sucrose 8TMS                   | SQRT           | After 2pm       | .040 <sup>un</sup> | 0.3             | 0.13                  | 1.8         |
| UN20_32.34_503                 | InvCBRT        | After 2pm       | .031 <sup>un</sup> | -0.6            | 0.28                  | 1.8         |
| Putrescine 4TMS                | None           | After 2pm       | .001               | 0.7             | 0.19                  | 1.8         |
| UN04_15.56_185                 | None           | After 2pm       | .013 <sup>un</sup> | 0.1             | 0.040                 | 1.8         |
| Tyrosine 3TMS                  | None           | After 2pm       | .010 <sup>un</sup> | 0.8             | 0.30                  | 1.7         |
| Fructose_MX1                   | None           | After 2pm       | .007 <sup>un</sup> | 0.2             | 0.072                 | 1.7         |
| Citric acid 4TMS               | None           | After 2pm       | .014               | 0.2             | 0.067                 | 1.6         |
| UN17_27.24_375                 | None           | After 2pm       | .009               | 0.01            | 0.0043                | 1.6         |
| Gluconic acid-1,5-lactone 4TMS | None           | After 2pm       | .023               | 0.3             | 0.11                  | 1.6         |
| Glucose MX1                    | None           | After 2pm       | .026               | 0.5             | 0.20                  | 1.5         |
| Fumarate 2TMS                  | None           | After 2pm       | .027               | 0.007           | 0.0030                | 1.5         |
| UN11_19.48_299                 | CBRT           | After 2pm       | .010               | -0.08           | 0.031                 | -2.1        |
| UN09_18.15_275                 | CBRT           | After 2pm       | .001               | -0.1            | 0.026                 | -2.3        |
| UN07_17.62_275                 | Ln             | After 2pm       | .001               | -0.8            | 0.22                  | -2.3        |
| Pipecolic acid 2TMS            | Ln             | After 2pm       | .042               | -0.8            | 0.40                  | -2.3        |
| Glutamate 3TMS                 | None           | After 2pm       | .004               | -1.1            | 0.35                  | -2.5        |
| UN01_10.61_158                 | CBRT           | After 2pm       | .000               | -0.09           | 0.017                 | -2.8        |
| Glutamine 3TMS                 | CBRT           | After 2pm       | .004               | -0.4            | 0.12                  | -3.0        |
| Asparagine_3TMS                | Ln             | After 2pm       | .015               | -1.3            | 0.49                  | -3.5        |
| UN08_17.96_360                 | CBRT           | After 2pm       | .000               | -0.2            | 0.051                 | -4.0        |
| Ornithine 3TMS                 | None           | After 2pm       | .005               | -0.2            | 0.057                 | -5.3        |

un = inhomogeneous sample variances as determined from Levene's test of equal variances,  
Ln = natural logarithm, InvCBRT = inverse cube root, SQRT = square root, CBRT = cube root. xTMS = Trimethylsilyl derivative where x = the number of TMS groups; yMX = methoxyamine derivatised product where y = 1 or 2
